# Supplementary material for: Unlocking the secrets of porous silicon formation: insights into magnesiothermic reduction mechanism using in situ powder X-ray diffraction studies
Source: Royal Society of Chemistry journal article supplement (doi:10.1039/d4nh00244j), 2024-01-01
Supplement: d4nh00244j1.pdf [file d4nh00244j1.pdf]

## Supplemental Information

# Unlocking the Secrets of Porous Silicon Formation: Insights into Magnesiothermic Reduction Mechanism using In-situ Powder X-ray Diffraction Studies

Sarah A. Martell<sup>a,‡</sup>, Maximilian Yan<sup>a,b,‡</sup>, Robert H. Coridan<sup>c</sup>, Kevin Stone<sup>d</sup>, Siddharth V. Patwardhan<sup>b\*</sup>, and Mita Dasog<sup>a,b\*</sup>

<sup>a</sup>*Department of Chemistry, Dalhousie University, 6274 Coburg Road, Halifax, NS B3H 4R2, Canada.*

<sup>b</sup>*Department of Chemical and Biological Engineering, The University of Sheffield, Mappin Street, Sheffield S1 3JD, United Kingdom.*

<sup>c</sup>*Department of Chemistry and Biochemistry, University of Arkansas, 119 Chemistry Building, 1 University of Arkansas, Fayetteville, AR 72701, USA.*

<sup>d</sup>*SLAC (Stanford Linear Accelerator Center) National Accelerator Laboratory*

\*Corresponding authors, [mita.dasog@dal.ca](mailto:mita.dasog@dal.ca), [s.patwardhan@sheffield.ac.uk](mailto:s.patwardhan@sheffield.ac.uk)

‡*These authors contributed equally to the work and their names can be listed in any order.*

## Data analysis

**XRD reflection area calculation.** The scans from in-situ XRD were uploaded into a MatLab workspace where the MgO reflections were integrated using the trapz function to calculate the approximate area under the MgO reflection. The trapz function performs a numerical integration of a region by breaking the area of interest into trapezoids and measuring the area of those trapezoids. The initial MgO reflection area at low temperatures is assumed to be due to crystallization of the native oxide layer on the surface of the Mg particles. The crystallization of the native oxide layer can be seen in control experiments where both sMg and LMg were heated to 650°C (Figure S6 and S8). For most of the heating stage the native oxide layer slowly crystallizes until a point where the Mg fully melts, and the Mg reflections disappear. The derivative (rate of change) of the MgO reflection area over time was plotted to identify where the transition from native oxide crystallization to the formation of new MgO occurred. The start of the reaction (formation of MgO) was identified to occur when the value of the derivative of MgO reflection area was greater than the average of the baseline plus 3x the standard derivative of the baseline in the derivative plot. This statistically indicates the formation of new MgO that occurs through reaction 1. A summary of the values is shown in Table S1 and S2.

The same process was used to statistically determine the formation of Mg<sub>2</sub>Si. Since there is no native Mg<sub>2</sub>Si present in the sample, the reflection area itself was used for analysis rather than the derivative of the reflection area. The reflection areas were measured between 39 - 41 ° 2θ (Cu Kα). The start of Mg<sub>2</sub>Si formation was identified to occur when the value of the Mg<sub>2</sub>Si reflection area was greater than the average of the baseline plus 3x the standard derivative of the baseline in the plot. A summary of the values is shown in Table S3. As there were nearby reflections at higher angles, the baseline was subtracted from the patterns in order to determine where the Mg<sub>2</sub>Si reflection disappeared. The disappearance of the reflection statistically occurred when the value of the Mg<sub>2</sub>Si reflection area was less than the average of the new baseline plus 3x the

standard derivative of the new baseline in the baseline subtracted  $\text{Mg}_2\text{Si}$  reflection area plot. A summary of the values is shown in Table S4.

**Reaction Onset Temperature Determination.** In-situ VT XRD experiments whereby sMg and LMg were heated separately under argon revealed slight growth in the MgO (200) reflection between 200-400°C. This was presumed to be due to crystallization of the native oxide layer on the Mg particle surface. With this in mind, to obtain a true reaction onset temperature for reaction 1, the sMg or LMg datasets were subtracted from the dataset of the reaction of interest. This avoids identifying the crystallization of the native oxide as an indication of the reaction onset.

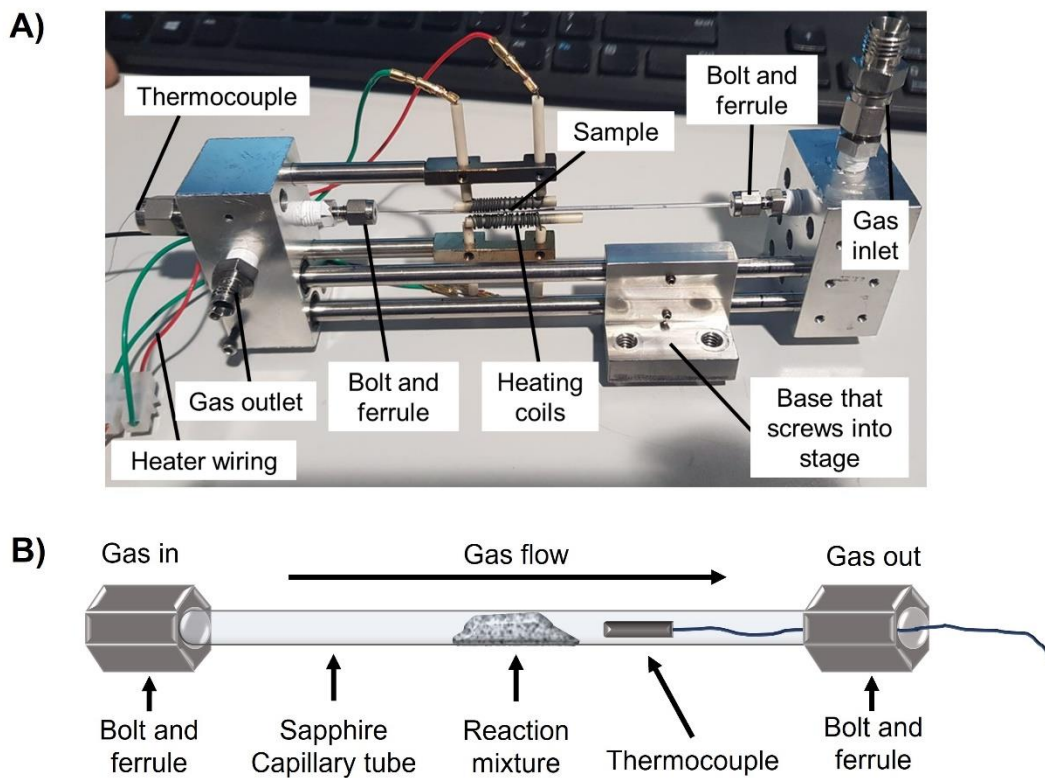

**Figure S1:** A) Sample holder and heating stage used for in-situ XRD experiments. B) Schematic of relative position of reaction mixture and thermocouple inside the sapphire capillary tube.

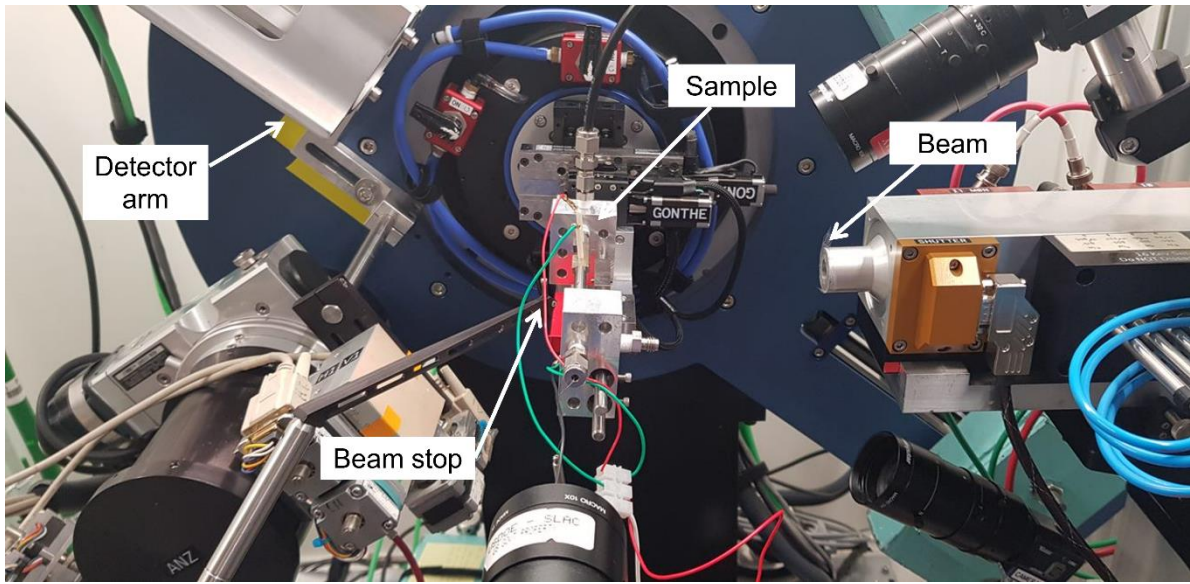

**Figure S2:** Beam-line setup for synchrotron experiments.

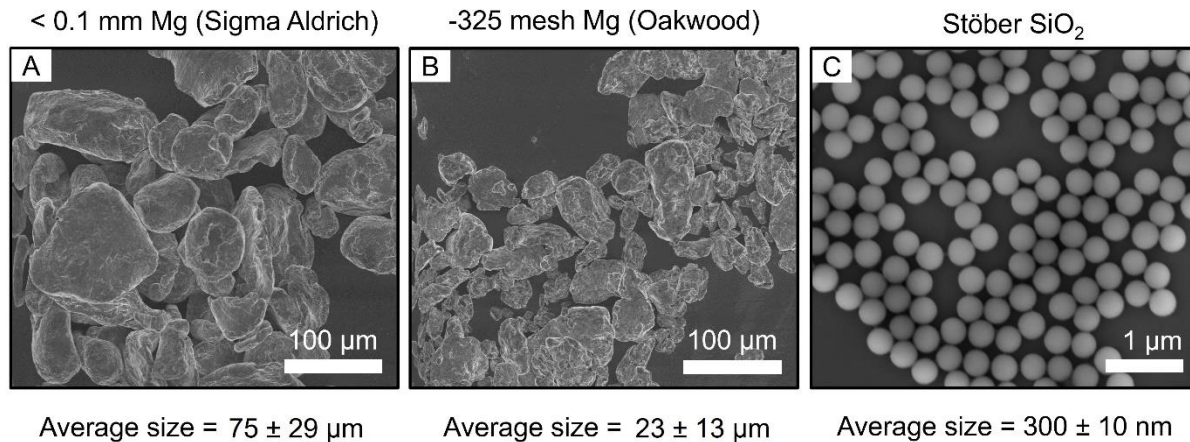

**Figure S3:** SEM images of Mg reagents along with average particle size measured lengthwise on ImageJ. A) LMg (<0.1 mm Mg from Sigma Aldrich), B) sMg (-325 mesh Mg from Oakwood Chemicals) and C) 300 nm Stöber SiO<sub>2</sub>. Images and sizing in panel A and B are reproduced from reference 39 with permission from the author.

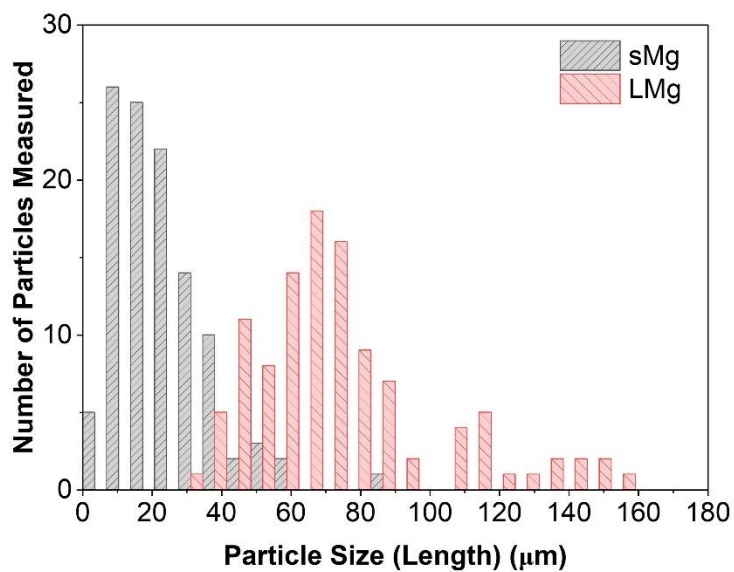

**Figure S4:** Histogram of size distribution of sMg and LMg particles. The diameter of 113 particles were measured lengthwise for each sample.

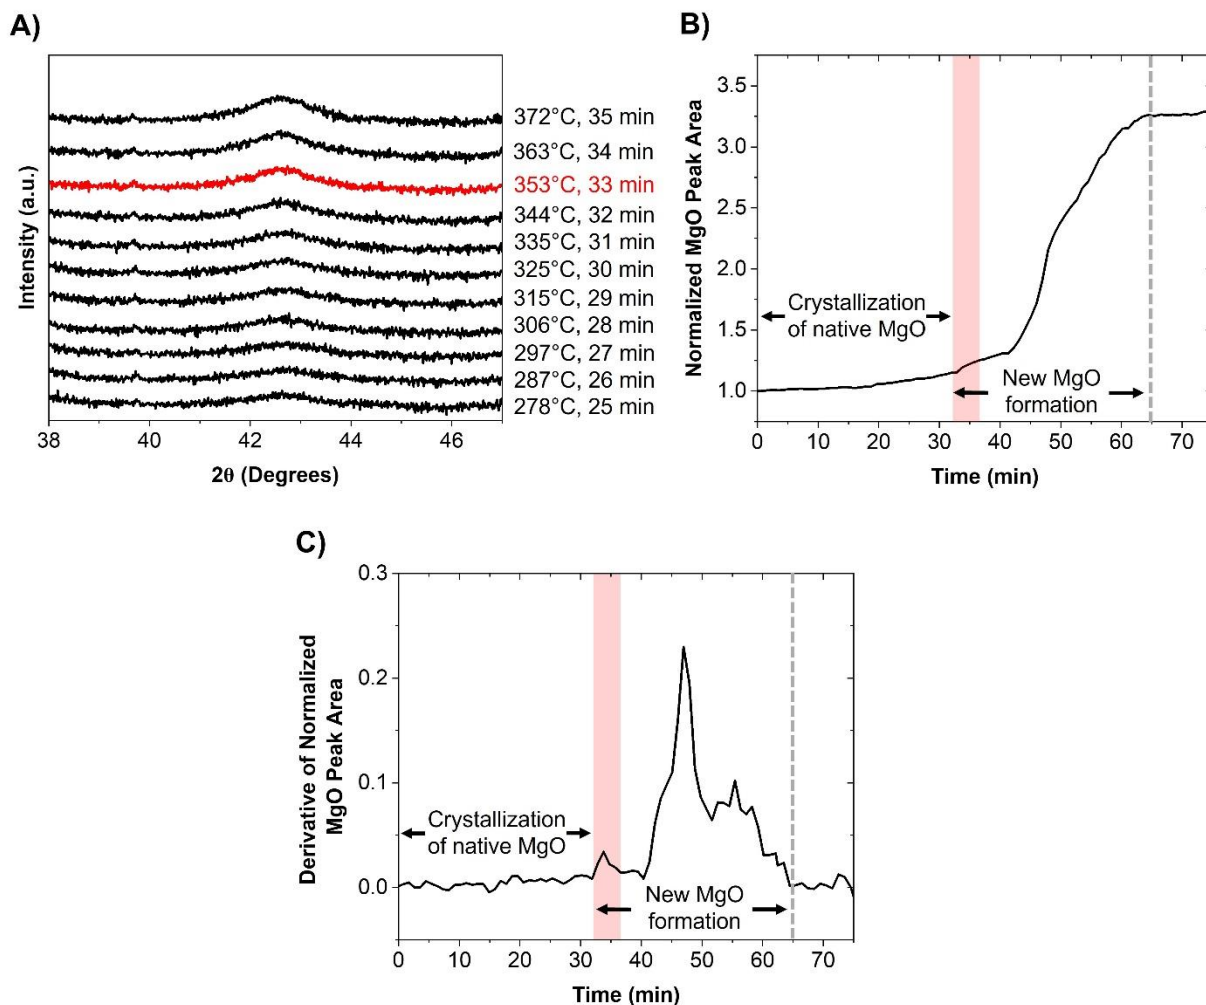

**Figure S5:** A) Waterfall plot of MgO reflections in sMg/SiO<sub>2</sub> system at 650°C, B) calculated MgO reflection area over time integrated from 40 to 44° 2θ for sMg sample at 650°C and C) calculated rate of change of the MgO reflection area over reaction time for sMg sample at 650°C. Red shading indicates when MgO begins to form via reaction 1. Grey hashed line indicates when the MgO reflection area plateaus. 2θ axis is in terms of Cu Kα wavelength.

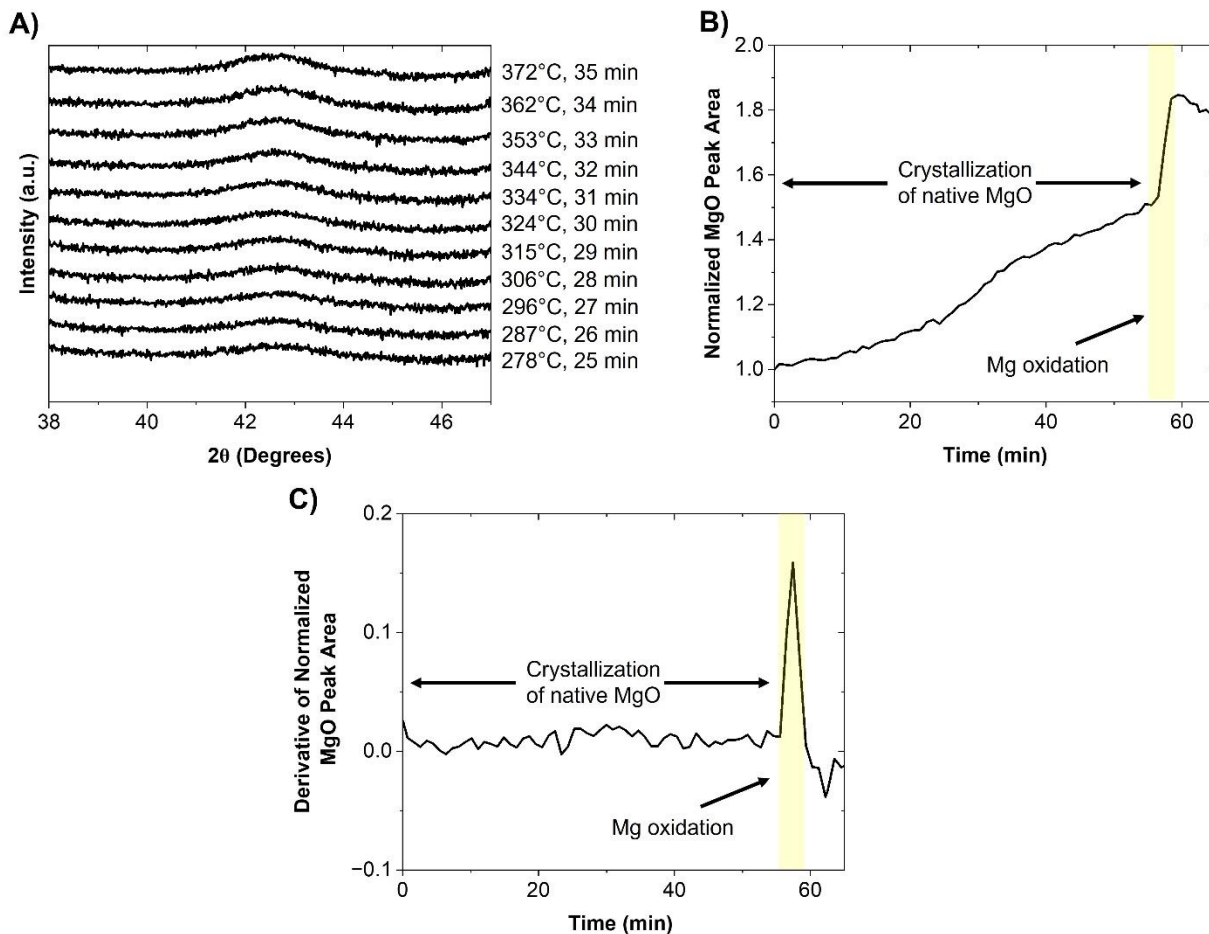

**Figure S6:** Control experiment for sMg by itself heated to 650°C at a ramp rate of 10°C/min. A) Waterfall plot of MgO reflection in sMg control sample at 650°C B) Calculated MgO reflection area over time integrated from 40 to 44°  $2\theta$  for sMg control sample at 650°C and C) calculated rate of change of the MgO reflection area over reaction time for sMg control sample at 650°C. Yellow shading indicates when MgO begins to form via the oxidation of Mg.  $2\theta$  axis is in terms of Cu  $k\alpha$  wavelength.



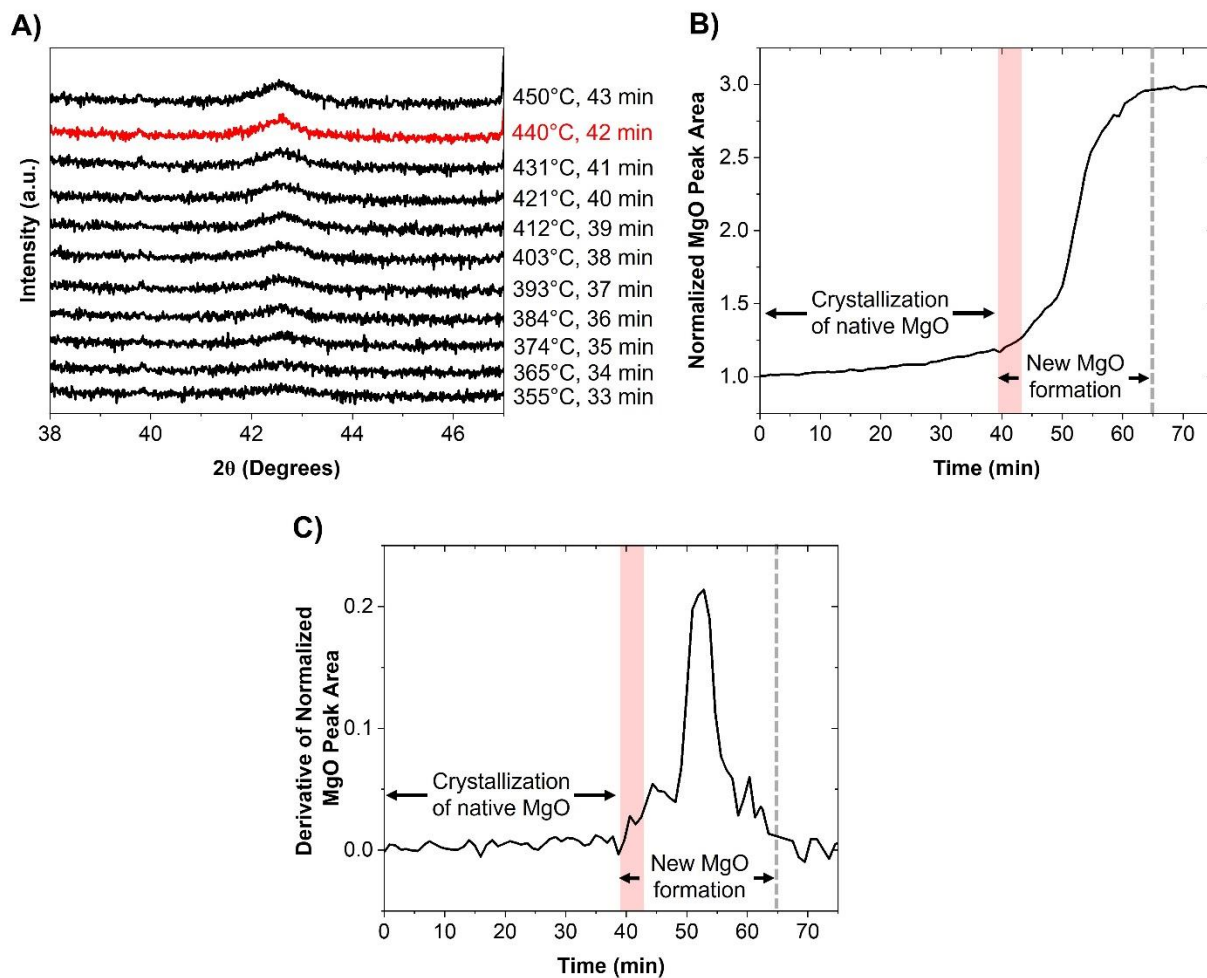

**Figure S7:** A) Waterfall plot of MgO reflection in LMg samples at 650°C B) Calculated MgO reflection area over time integrated from 40 to 44° 2θ for LMg sample at 650°C and C) calculated rate of change of the MgO reflection area over reaction time for LMg sample at 650°C. Red shading indicates when MgO begins to form via reaction 1. Grey hashed line indicates when the MgO reflection area plateaus. 2θ axis is in terms of Cu kα wavelength.

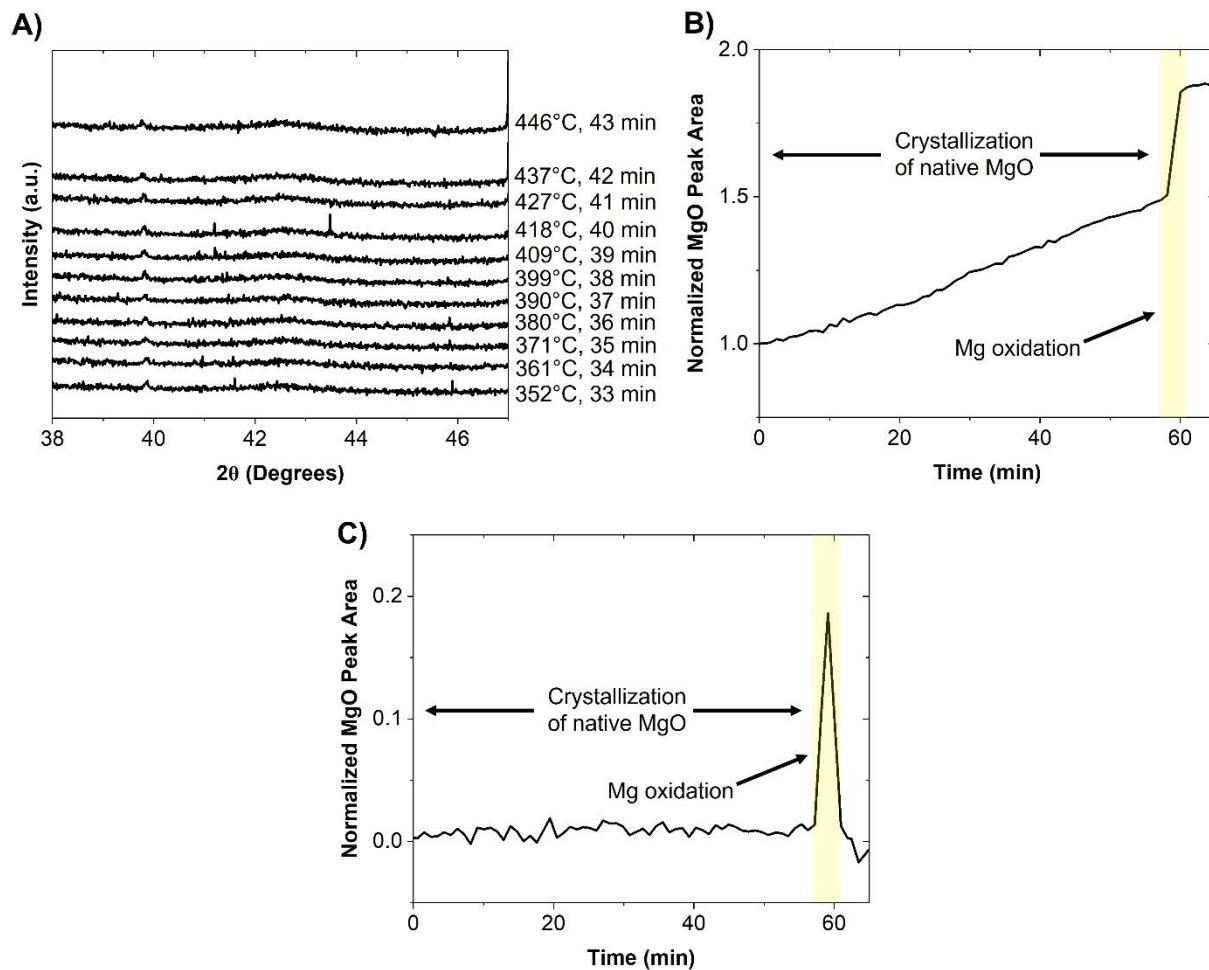

**Figure S8:** Control experiment for LMg by itself heated to 650°C at a ramp rate of 10°C/min. A) Waterfall plot of MgO reflection in LMg control sample at 650°C B) Calculated MgO reflection area over time integrated from 40 to 44°  $2\theta$  for LMg control sample at 650°C and C) calculated rate of change of the MgO reflection area over reaction time for LMg control sample at 650°C. Yellow shading indicates when MgO begins to form via the oxidation of Mg.  $2\theta$  axis is in terms of Cu  $k\alpha$  wavelength.

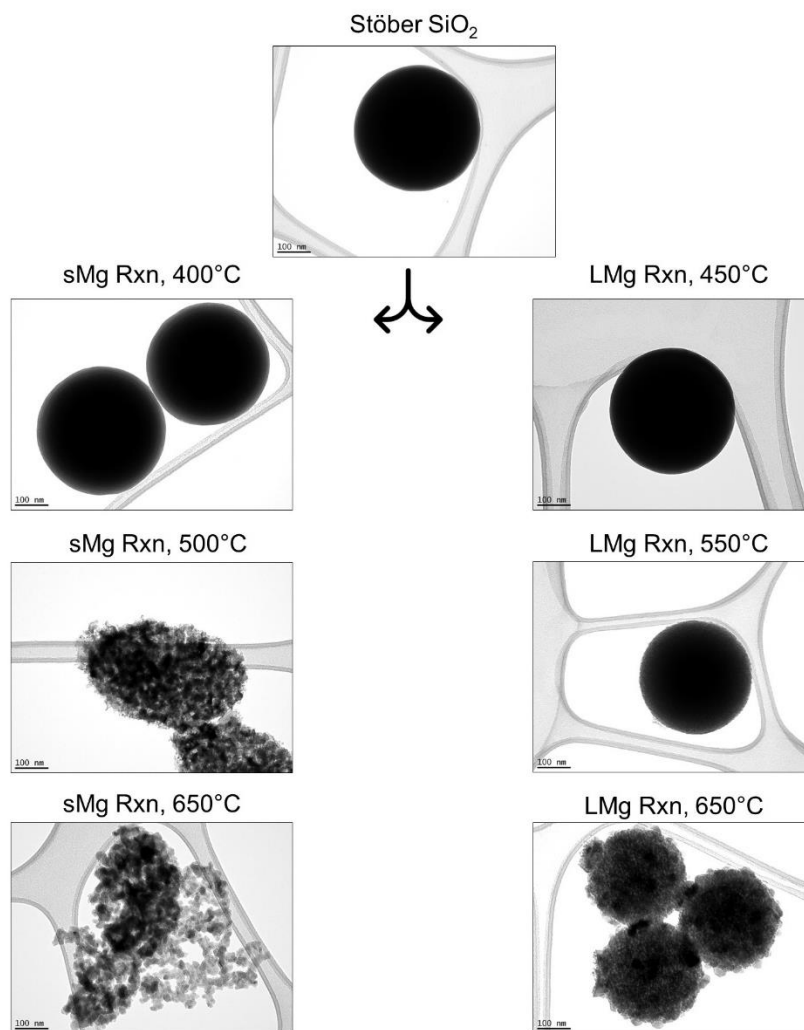

**Figure S9.** TEM images of SiO<sub>2</sub> or MgTR reaction products collected at the given reaction temperatures listed above followed by treatment with HCl (performed at laboratory scale).

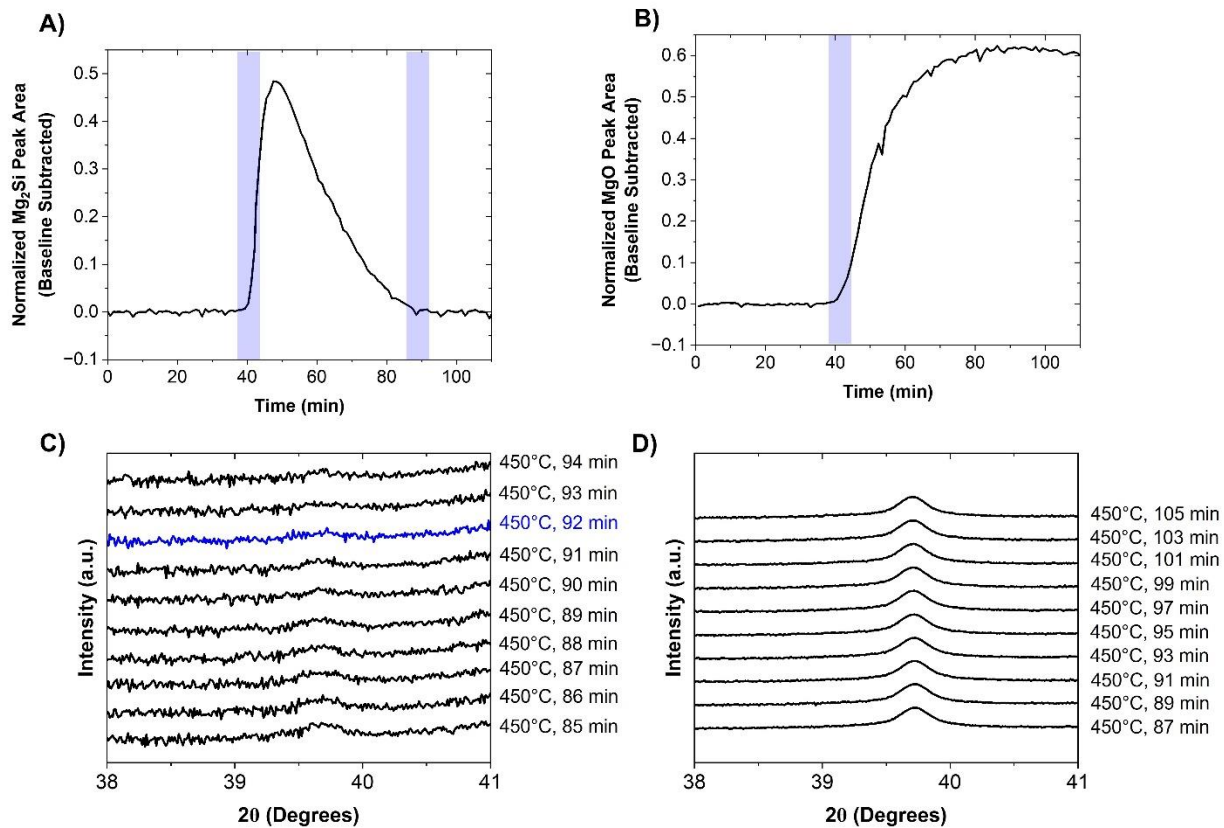

**Figure S10:** The change in  $Mg_2Si$  reflection area over time for  $450^\circ C$  samples involving A) sMg and B) LMg. The disappearance of  $Mg_2Si$  for samples involving C) sMg and D) LMg. Reaction events involving  $Mg_2Si$  are traced in blue.  $2\theta$  axis is in terms of  $Cu\ \alpha$  wavelength.

## Thermodynamic calculations

Values for reaction enthalpy, entropy and Gibbs free energy were calculated for temperatures between 298 and 1300 K using the Shomate equations reported on the NIST Chemistry WebBook. Data for reactions 1 and 3 were not available and were calculated using the formation enthalpy and entropy of each compound present in the reaction and applying Hess's law. Calculations were corrected for phase changes where appropriate with values obtained from NIST.

Shomate equations for calculating 1) the change in enthalpy from 298K up to a specified temperature T and 2) entropy (NIST Chemistry WebBook).

$$H - H_{298} = A * T + \frac{B * T^2}{2} + \frac{CT^3}{3} + \frac{DT^4}{4} - \frac{E}{T} + F - H \quad \text{Equation S2}$$

$$\Delta S = A * \ln(T) + BT + \frac{CT^2}{2} + \frac{DT^3}{3} - \frac{E}{2T^2} + G \quad \text{Equation S3}$$

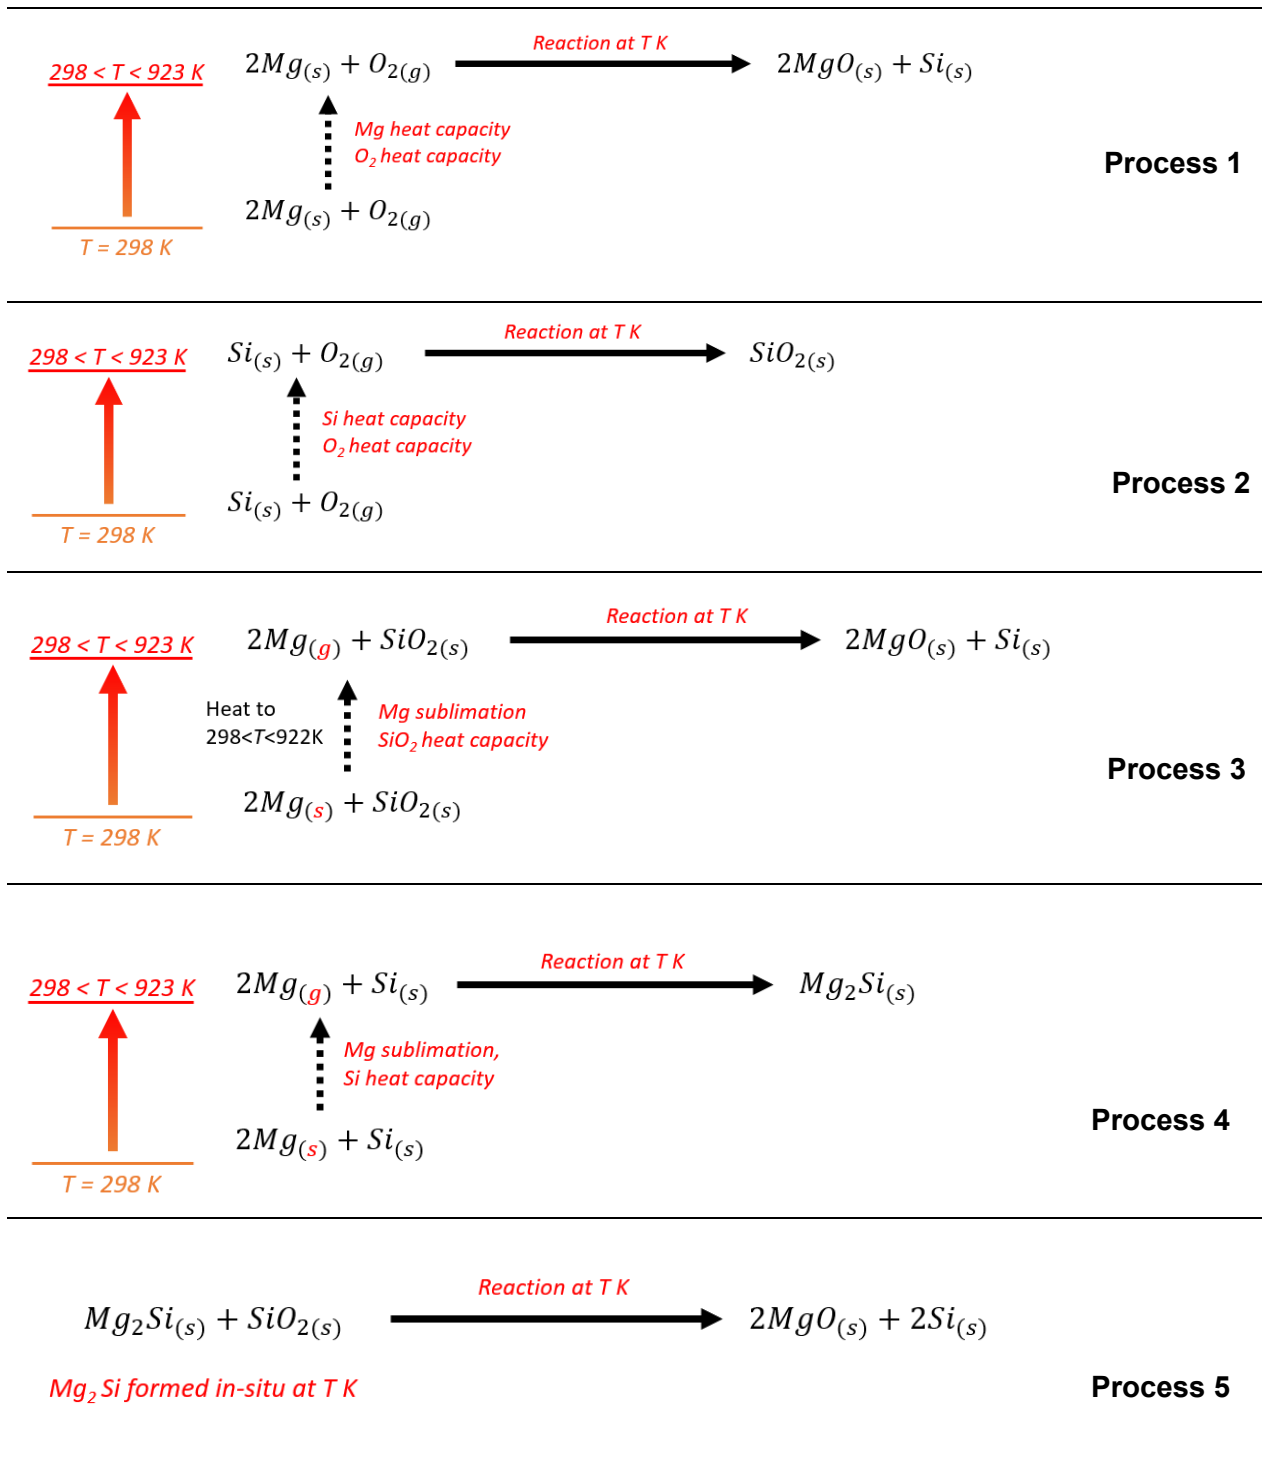

Schemes showing the physical and chemical processes for which thermodynamic calculations were performed in this work.

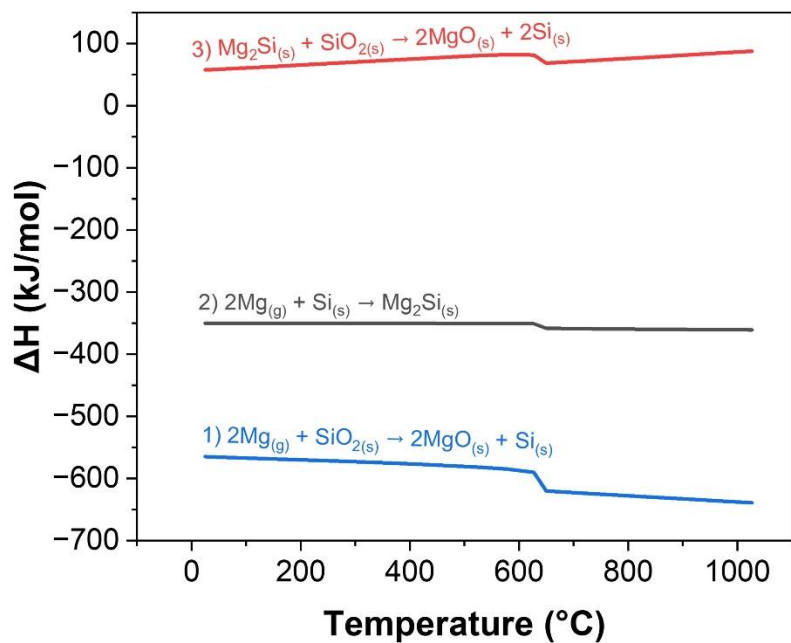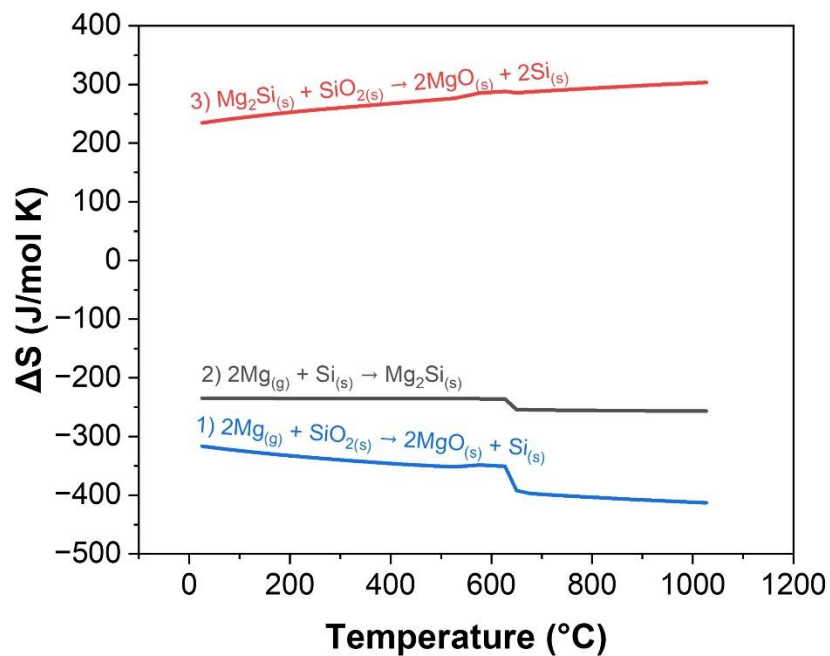

Figure S11: A) Reaction enthalpies and B) reaction entropies between 25° and 1027°C.

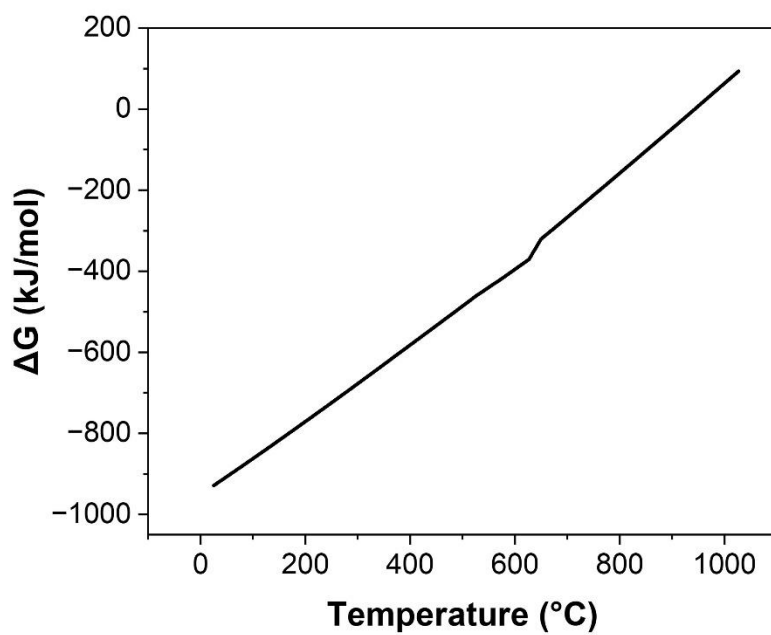

**Figure S12.**  $\Delta G$  of reaction 4 between the range of 25 and 1027 $^{\circ}\text{C}$ .



**Table S1:** List of values for the derivative of normalized MgO reflection area for sMg samples reacted at 650°C, 450°C as well as the sMg control sample heated to 650°C. Reflections indicating MgO growth were identified when the value for the derivative of normalized MgO reflection area was greater than the average baseline plus 3x the standard deviation of the baseline. These values are highlighted in yellow within the table.

| sMg (reaction) 650°C              |                  | sMg (control) 650°C               |                  |
|-----------------------------------|------------------|-----------------------------------|------------------|
| Average baseline + 3X STD         |                  | Average baseline + 3X STD         |                  |
| 0.0503                            |                  | 0.0171                            |                  |
| Derivative of MgO Reflection Area | Temperature (°C) | Derivative of MgO Reflection Area | Temperature (°C) |
| 0.0004                            | 26               | 0.0136                            | 24               |
| 0.0010                            | 32               | 0.0061                            | 32               |
| 0.0014                            | 42               | 0.0019                            | 42               |
| 0.0000                            | 51               | 0.0048                            | 51               |
| 0.0001                            | 61               | 0.0034                            | 60               |
| 0.0018                            | 70               | 0.0004                            | 70               |
| 0.0010                            | 80               | -0.0014                           | 79               |
| 0.0004                            | 89               | 0.0013                            | 89               |
| -0.0005                           | 99               | 0.0021                            | 98               |
| -0.0007                           | 108              | 0.0041                            | 108              |
| 0.0007                            | 117              | 0.0058                            | 117              |
| 0.0008                            | 127              | 0.0010                            | 127              |
| 0.0012                            | 137              | 0.0042                            | 136              |
| 0.0008                            | 146              | 0.0033                            | 145              |
| 0.0010                            | 155              | 0.0021                            | 155              |
| 0.0010                            | 165              | 0.0062                            | 164              |
| -0.0013                           | 174              | 0.0032                            | 174              |
| -0.0005                           | 184              | 0.0017                            | 183              |
| 0.0019                            | 193              | 0.0058                            | 193              |
| 0.0011                            | 203              | 0.0068                            | 202              |
| 0.0032                            | 212              | 0.0032                            | 211              |
| 0.0033                            | 221              | 0.0018                            | 221              |
| 0.0015                            | 231              | 0.0071                            | 230              |
| 0.0021                            | 240              | 0.0091                            | 240              |
| 0.0018                            | 250              | -0.0015                           | 249              |
| 0.0024                            | 259              | 0.0021                            | 259              |
| 0.0018                            | 268              | 0.0103                            | 268              |
| 0.0026                            | 278              | 0.0102                            | 278              |
| 0.0019                            | 287              | 0.0081                            | 287              |
| 0.0011                            | 297              | 0.0069                            | 296              |
| 0.0020                            | 306              | 0.0096                            | 306              |
| 0.0032                            | 316              | 0.0120                            | 315              |
| 0.0034                            | 325              | 0.0099                            | 325              |

|        |     |         |     |
|--------|-----|---------|-----|
| 0.0034 | 335 | 0.0112  | 334 |
| 0.0025 | 344 | 0.0095  | 344 |
| 0.0069 | 353 | 0.0067  | 353 |
| 0.0102 | 363 | 0.0094  | 363 |
| 0.0067 | 372 | 0.0065  | 372 |
| 0.0058 | 382 | 0.0023  | 381 |
| 0.0043 | 391 | 0.0022  | 391 |
| 0.0043 | 400 | 0.0059  | 400 |
| 0.0048 | 410 | 0.0078  | 410 |
| 0.0046 | 419 | 0.0067  | 419 |
| 0.0025 | 429 | 0.0012  | 428 |
| 0.0073 | 438 | 0.0020  | 438 |
| 0.0185 | 448 | 0.0082  | 447 |
| 0.0254 | 457 | 0.0046  | 457 |
| 0.0291 | 466 | 0.0021  | 466 |
| 0.0328 | 476 | 0.0043  | 476 |
| 0.0479 | 485 | 0.0032  | 485 |
| 0.0686 | 495 | 0.0052  | 494 |
| 0.0582 | 504 | 0.0050  | 504 |
| 0.0339 | 513 | 0.0057  | 513 |
| 0.0258 | 523 | 0.0075  | 523 |
| 0.0224 | 532 | 0.0033  | 532 |
| 0.0192 | 542 | 0.0017  | 543 |
| 0.0243 | 551 | 0.0092  | 552 |
| 0.0242 | 561 | 0.0069  | 561 |
| 0.0232 | 570 | 0.0066  | 571 |
| 0.0305 | 579 | 0.0537  | 580 |
| 0.0224 | 589 | 0.0860  | 590 |
| 0.0209 | 598 | 0.0430  | 599 |
| 0.0230 | 607 | 0.0024  | 609 |
| 0.0175 | 617 | -0.0073 | 618 |
| 0.0092 | 627 | -0.0076 | 628 |
| 0.0093 | 637 | -0.0072 | 637 |
| 0.0091 | 647 | -0.0043 | 647 |
| 0.0056 | 650 | -0.0034 | 650 |

**Table S2:** List of values for the derivative of normalized MgO reflection area for LMg samples reacted at 650°C, 450°C as well as the LMg control sample heated to 650°C. Reflections indicating MgO growth were identified when the value for the derivative of normalized MgO reflection area was greater than the average baseline plus 3x the standard deviation of the baseline. These values are highlighted in yellow within the table.

| <b>LMg (reaction) 650°C</b>              |                         | <b>LMg (control) 650°C</b>               |                         |
|------------------------------------------|-------------------------|------------------------------------------|-------------------------|
| <b>Average baseline + 3X STD</b>         |                         | <b>Average baseline + 3X STD</b>         |                         |
| 0.0050                                   |                         | 0.0121                                   |                         |
| <b>Derivative of MgO Reflection Area</b> | <b>Temperature (°C)</b> | <b>Derivative of MgO Reflection Area</b> | <b>Temperature (°C)</b> |
| -0.0007                                  | 26                      | 0.0015                                   | 25                      |
| -0.0005                                  | 33                      | 0.0013                                   | 31                      |
| 0.0015                                   | 43                      | 0.0039                                   | 40                      |
| 0.0013                                   | 52                      | 0.0020                                   | 50                      |
| 0.0002                                   | 62                      | 0.0022                                   | 59                      |
| 0.0003                                   | 71                      | 0.0039                                   | 69                      |
| -0.0001                                  | 80                      | 0.0027                                   | 78                      |
| -0.0002                                  | 90                      | 0.0054                                   | 88                      |
| 0.0014                                   | 100                     | 0.0032                                   | 97                      |
| 0.0024                                   | 109                     | -0.0011                                  | 106                     |
| 0.0016                                   | 118                     | 0.0059                                   | 116                     |
| 0.0007                                   | 128                     | 0.0053                                   | 125                     |
| 0.0004                                   | 137                     | 0.0059                                   | 135                     |
| 0.0001                                   | 147                     | 0.0043                                   | 144                     |
| 0.0001                                   | 156                     | 0.0006                                   | 154                     |
| 0.0009                                   | 165                     | 0.0066                                   | 163                     |
| 0.0027                                   | 175                     | 0.0043                                   | 173                     |
| 0.0012                                   | 184                     | 0.0000                                   | 182                     |
| -0.0017                                  | 194                     | 0.0024                                   | 191                     |
| 0.0015                                   | 204                     | -0.0005                                  | 201                     |
| 0.0028                                   | 213                     | 0.0053                                   | 210                     |
| 0.0010                                   | 233                     | 0.0100                                   | 220                     |
| 0.0024                                   | 242                     | 0.0016                                   | 230                     |
| 0.0020                                   | 251                     | 0.0036                                   | 239                     |
| 0.0015                                   | 261                     | 0.0063                                   | 248                     |
| 0.0019                                   | 270                     | 0.0052                                   | 258                     |
| 0.0005                                   | 280                     | 0.0062                                   | 267                     |
| 0.0001                                   | 299                     | 0.0058                                   | 277                     |
| 0.0029                                   | 308                     | 0.0047                                   | 286                     |
| 0.0035                                   | 318                     | 0.0090                                   | 295                     |
| 0.0024                                   | 327                     | 0.0077                                   | 305                     |
| 0.0033                                   | 337                     | 0.0078                                   | 314                     |
| 0.0031                                   | 346                     | 0.0064                                   | 324                     |

|         |     |        |     |
|---------|-----|--------|-----|
| 0.0025  | 355 | 0.0027 | 333 |
| 0.0012  | 365 | 0.0040 | 343 |
| 0.0017  | 374 | 0.0055 | 352 |
| 0.0040  | 384 | 0.0027 | 361 |
| 0.0033  | 393 | 0.0067 | 371 |
| 0.0020  | 403 | 0.0082 | 380 |
| 0.0037  | 412 | 0.0039 | 390 |
| -0.0011 | 421 | 0.0054 | 399 |
| 0.0028  | 431 | 0.0056 | 409 |
| 0.0092  | 440 | 0.0019 | 418 |
| 0.0069  | 450 | 0.0059 | 428 |
| 0.0089  | 459 | 0.0049 | 437 |
| 0.0132  | 469 | 0.0031 | 446 |
| 0.0176  | 478 | 0.0070 | 456 |
| 0.0159  | 488 | 0.0053 | 465 |
| 0.0157  | 497 | 0.0073 | 474 |
| 0.0138  | 506 | 0.0063 | 484 |
| 0.0130  | 516 | 0.0046 | 494 |
| 0.0223  | 525 | 0.0043 | 503 |
| 0.0418  | 534 | 0.0047 | 512 |
| 0.0644  | 544 | 0.0040 | 522 |
| 0.0688  | 553 | 0.0028 | 531 |
| 0.0691  | 563 | 0.0037 | 541 |
| 0.0612  | 572 | 0.0035 | 550 |
| 0.0370  | 582 | 0.0023 | 559 |
| 0.0248  | 591 | 0.0056 | 569 |
| 0.0209  | 600 | 0.0074 | 578 |
| 0.0197  | 610 | 0.0049 | 587 |
| 0.0097  | 619 | 0.0072 | 597 |
| 0.0142  | 629 | 0.0558 | 607 |
| 0.0200  | 638 | 0.0988 | 616 |
| 0.0084  | 647 | 0.0527 | 625 |
| 0.0062  | 650 | 0.0066 | 634 |

**Table S3** : List of values for the normalized Mg<sub>2</sub>Si reflection area for sMg and LMg samples reacted at 650°C. Reflections indicating Mg<sub>2</sub>Si growth were identified when the value for the normalized Mg<sub>2</sub>Si reflection area was greater than the average baseline plus 3x the standard deviation of the baseline. These values are highlighted in yellow within the table.

| sMg (reaction) 650°C               |                  | LMg (reaction) 650°C               |                  |
|------------------------------------|------------------|------------------------------------|------------------|
| Average baseline + 3X STD          |                  | Average baseline + 3X STD          |                  |
| 0.4984                             |                  | 0.6605                             |                  |
| Mg <sub>2</sub> Si Reflection Area | Temperature (°C) | Mg <sub>2</sub> Si Reflection Area | Temperature (°C) |
| 0.4434                             | 26               | 0.5659                             | 26               |
| 0.4484                             | 32               | 0.5674                             | 33               |
| 0.4453                             | 51               | 0.5684                             | 43               |
| 0.4487                             | 61               | 0.5742                             | 52               |
| 0.4529                             | 70               | 0.5781                             | 62               |
| 0.4530                             | 80               | 0.5763                             | 71               |
| 0.4506                             | 89               | 0.5749                             | 80               |
| 0.4563                             | 99               | 0.5759                             | 90               |
| 0.4559                             | 108              | 0.5727                             | 100              |
| 0.4514                             | 117              | 0.5796                             | 109              |
| 0.4553                             | 127              | 0.5789                             | 118              |
| 0.4581                             | 137              | 0.5858                             | 128              |
| 0.4592                             | 146              | 0.5873                             | 137              |
| 0.4553                             | 155              | 0.5826                             | 147              |
| 0.4580                             | 165              | 0.5801                             | 156              |
| 0.4600                             | 174              | 0.5928                             | 165              |
| 0.4442                             | 184              | 0.5912                             | 175              |
| 0.4650                             | 193              | 0.5937                             | 184              |
| 0.4589                             | 203              | 0.5941                             | 194              |
| 0.4619                             | 212              | 0.5967                             | 204              |
| 0.4680                             | 221              | 0.5967                             | 213              |
| 0.4698                             | 231              | 0.5985                             | 222              |
| 0.4686                             | 240              | 0.5930                             | 233              |
| 0.4618                             | 250              | 0.6009                             | 242              |
| 0.4686                             | 259              | 0.6009                             | 251              |
| 0.4713                             | 268              | 0.6070                             | 261              |
| 0.4685                             | 278              | 0.6087                             | 270              |
| 0.4738                             | 287              | 0.6054                             | 280              |
| 0.4730                             | 297              | 0.6069                             | 289              |
| 0.4744                             | 306              | 0.6054                             | 299              |
| 0.4677                             | 316              | 0.6151                             | 308              |
| 0.4750                             | 325              | 0.6103                             | 318              |
| 0.4747                             | 335              | 0.6171                             | 327              |
| 0.4796                             | 344              | 0.6174                             | 337              |
| 0.4758                             | 353              | 0.6188                             | 346              |

|        |     |        |     |
|--------|-----|--------|-----|
| 0.4802 | 363 | 0.6198 | 355 |
| 0.4786 | 372 | 0.6233 | 365 |
| 0.4690 | 382 | 0.6228 | 374 |
| 0.4799 | 391 | 0.6247 | 384 |
| 0.4779 | 400 | 0.6265 | 393 |
| 0.4805 | 410 | 0.6264 | 403 |
| 0.4822 | 419 | 0.6288 | 412 |
| 0.4827 | 429 | 0.6310 | 421 |
| 0.4823 | 438 | 0.6320 | 431 |
| 0.4896 | 448 | 0.6342 | 440 |
| 0.5192 | 457 | 0.6412 | 450 |
| 0.5678 | 466 | 0.6519 | 459 |
| 0.6108 | 476 | 0.6688 | 469 |
| 0.6756 | 485 | 0.6784 | 478 |
| 0.8111 | 495 | 0.7002 | 488 |
| 0.9579 | 504 | 0.7158 | 497 |
| 1.0000 | 513 | 0.7299 | 506 |
| 0.9974 | 523 | 0.7548 | 516 |
| 0.9592 | 532 | 0.7796 | 525 |
| 0.9194 | 542 | 0.8247 | 534 |
| 0.8668 | 551 | 0.8949 | 544 |
| 0.8177 | 561 | 0.9579 | 553 |
| 0.7655 | 570 | 0.9857 | 563 |
| 0.7155 | 579 | 1.0000 | 572 |
| 0.6749 | 589 | 0.9772 | 582 |
| 0.6361 | 598 | 0.9355 | 591 |
| 0.6018 | 607 | 0.8898 | 600 |
| 0.5766 | 617 | 0.8505 | 610 |
| 0.5560 | 627 | 0.8270 | 619 |
| 0.5387 | 637 | 0.7857 | 629 |
| 0.5235 | 647 | 0.7682 | 638 |
| 0.5179 | 650 | 0.7500 | 647 |
| 0.5172 | 650 | 0.7352 | 650 |
| 0.5112 | 650 | 0.7237 | 650 |
| 0.5088 | 650 | 0.7189 | 650 |
| 0.5072 | 650 | 0.7156 | 650 |
| 0.5088 | 650 | 0.6989 | 650 |
| 0.4882 | 650 | 0.7042 | 650 |
| 0.5053 | 650 | 0.6991 | 650 |
| 0.5018 | 650 | 0.6983 | 650 |
| 0.5021 | 650 | 0.6933 | 650 |
| 0.4993 | 650 | 0.6949 | 650 |
| 0.4997 | 650 | 0.6916 | 650 |

|        |     |        |     |
|--------|-----|--------|-----|
| 0.4973 | 650 | 0.6840 | 650 |
| 0.4934 | 650 | 0.6794 | 650 |
| 0.4918 | 650 | 0.6843 | 650 |
| 0.4970 | 650 | 0.6791 | 650 |
| 0.4947 | 650 | 0.6760 | 650 |
| 0.4961 | 650 | 0.6746 | 650 |
| 0.4962 | 650 | 0.6752 | 650 |
| 0.4990 | 650 | 0.6650 | 650 |
| 0.4889 | 650 | 0.6653 | 650 |
| 0.4952 | 650 | 0.6627 | 650 |
| 0.4959 | 650 | 0.6633 | 650 |
| 0.4953 | 650 | 0.6565 | 650 |
| 0.4954 | 650 | 0.6569 | 650 |
| 0.4897 | 650 | 0.6455 | 650 |
| 0.4961 | 650 | 0.6431 | 650 |
| 0.4913 | 650 | 0.6403 | 650 |
| 0.4910 | 650 | 0.6333 | 650 |
| 0.4953 | 650 | 0.6282 | 650 |
| 0.4929 | 650 | 0.6265 | 650 |
| 0.4904 | 650 | 0.6242 | 650 |
| 0.4923 | 650 | 0.6282 | 650 |
| 0.4913 | 650 | 0.6231 | 650 |
| 0.4900 | 650 | 0.6297 | 650 |
| 0.4919 | 650 | 0.6339 | 650 |
| 0.4924 | 650 | 0.6331 | 650 |
| 0.4916 | 650 | 0.6348 | 650 |
| 0.4923 | 650 | 0.6305 | 650 |
| 0.4933 | 650 | 0.6389 | 650 |
| 0.4953 | 650 | 0.6412 | 650 |
| 0.4949 | 650 | 0.6357 | 650 |
| 0.4970 | 650 | 0.6423 | 650 |
| 0.4951 | 650 | 0.6386 | 650 |
| 0.4957 | 650 | 0.6379 | 650 |
| 0.4983 | 650 | 0.6386 | 650 |
| 0.4932 | 650 | 0.6401 | 650 |
| 0.4995 | 650 | 0.6439 | 650 |

**Table S4:** List of values for the baseline subtracted, normalized Mg<sub>2</sub>Si reflection area for sMg and LMg samples reacted at 650°C and 450°C. As per Table S3, reflections indicating Mg<sub>2</sub>Si growth were identified when the value for the normalized Mg<sub>2</sub>Si reflection area was greater than the average baseline plus 3x the standard deviation of the baseline (shown in yellow). The disappearance of the Mg<sub>2</sub>Si reflection is indicated when the value for the baseline subtracted, normalized Mg<sub>2</sub>Si reflection area was greater than the average baseline plus 3x the standard deviation of the baseline. These values are highlighted in red within the table.

| sMg (reaction) 650°C               |                  | sMg (reaction) 450°C               |                  | LMg (reaction) 650°C               |                  |
|------------------------------------|------------------|------------------------------------|------------------|------------------------------------|------------------|
| Average baseline + 3X STD          |                  | Average baseline + 3X STD          |                  | Average baseline + 3X STD          |                  |
| 0.0102                             |                  | 0.0024                             |                  | 0.0049                             |                  |
| Mg <sub>2</sub> Si Reflection Area | Temperature (°C) | Mg <sub>2</sub> Si Reflection Area | Temperature (°C) | Mg <sub>2</sub> Si Reflection Area | Temperature (°C) |
| 0.0018                             | 26               | 0.0006                             | 25               | 0.0000                             | 26               |
| 0.0058                             | 32               | -0.0081                            | 32               | 0.0002                             | 33               |
| 0.0000                             | 51               | 0.0001                             | 41               | -0.0024                            | 43               |
| 0.0022                             | 61               | 0.0000                             | 50               | 0.0016                             | 52               |
| 0.0050                             | 70               | 0.0005                             | 61               | 0.0038                             | 62               |
| 0.0037                             | 80               | -0.0014                            | 70               | 0.0000                             | 71               |
| 0.0000                             | 89               | 0.0025                             | 79               | -0.0019                            | 80               |
| 0.0046                             | 99               | -0.0004                            | 88               | -0.0014                            | 90               |
| 0.0029                             | 108              | -0.0107                            | 97               | -0.0051                            | 100              |
| -0.0027                            | 117              | -0.0027                            | 107              | 0.0012                             | 109              |
| 0.0000                             | 127              | 0.0000                             | 117              | 0.0000                             | 118              |
| 0.0021                             | 137              | -0.0004                            | 126              | 0.0040                             | 128              |
| 0.0025                             | 146              | 0.0001                             | 135              | 0.0027                             | 137              |
| -0.0020                            | 155              | 0.0060                             | 145              | -0.0047                            | 147              |
| 0.0000                             | 165              | 0.0007                             | 154              | -0.0100                            | 156              |
| 0.0012                             | 174              | -0.0043                            | 163              | 0.0000                             | 165              |
| -0.0154                            | 184              | 0.0016                             | 173              | -0.0026                            | 175              |
| 0.0046                             | 193              | 0.0000                             | 182              | -0.0012                            | 184              |
| -0.0023                            | 203              | 0.0021                             | 192              | -0.0018                            | 194              |
| 0.0000                             | 212              | 0.0009                             | 202              | -0.0002                            | 204              |
| 0.0061                             | 221              | -0.0025                            | 211              | -0.0012                            | 213              |
| 0.0080                             | 231              | -0.0007                            | 220              | -0.0004                            | 222              |
| 0.0068                             | 240              | -0.0076                            | 230              | -0.0069                            | 233              |
| 0.0000                             | 250              | -0.0014                            | 239              | 0.0000                             | 242              |
| 0.0038                             | 259              | 0.0000                             | 249              | -0.0012                            | 251              |
| 0.0035                             | 268              | -0.0019                            | 258              | 0.0037                             | 261              |
| -0.0024                            | 278              | 0.0015                             | 267              | 0.0042                             | 270              |
| 0.0000                             | 287              | 0.0046                             | 277              | -0.0003                            | 280              |
| -0.0011                            | 297              | 0.0028                             | 287              | 0.0000                             | 289              |
| 0.0000                             | 306              | -0.0099                            | 296              | -0.0037                            | 299              |
| -0.0070                            | 316              | 0.0062                             | 305              | 0.0040                             | 308              |



|         |     |         |     |         |     |
|---------|-----|---------|-----|---------|-----|
| 0.0000  | 325 | 0.0000  | 315 | -0.0029 | 318 |
| -0.0017 | 335 | 0.0030  | 324 | 0.0018  | 327 |
| 0.0020  | 344 | 0.0052  | 334 | 0.0000  | 337 |
| -0.0031 | 353 | 0.0000  | 343 | 0.0000  | 346 |
| 0.0000  | 363 | 0.0030  | 352 | -0.0005 | 355 |
| -0.0023 | 372 | -0.0065 | 362 | 0.0015  | 365 |
| -0.0127 | 382 | 0.0011  | 371 | -0.0004 | 374 |
| -0.0026 | 391 | 0.0031  | 380 | 0.0000  | 384 |
| -0.0054 | 400 | 0.0014  | 390 | 0.0017  | 393 |
| -0.0035 | 410 | 0.0039  | 400 | 0.0015  | 403 |
| -0.0026 | 419 | 0.0044  | 409 | 0.0037  | 412 |
| -0.0029 | 429 | 0.0066  | 418 | 0.0058  | 421 |
| -0.0041 | 438 | 0.0177  | 428 | 0.0068  | 431 |
| 0.0025  | 448 | 0.0622  | 437 | 0.0088  | 440 |
| 0.0314  | 457 | 0.1353  | 446 | 0.0157  | 450 |
| 0.0792  | 466 | 0.2202  | 450 | 0.0262  | 459 |
| 0.1215  | 476 | 0.3161  | 450 | 0.0431  | 469 |
| 0.1855  | 485 | 0.3999  | 451 | 0.0525  | 478 |
| 0.3203  | 495 | 0.4478  | 450 | 0.0742  | 488 |
| 0.4663  | 504 | 0.4614  | 450 | 0.0897  | 497 |
| 0.5077  | 513 | 0.4842  | 450 | 0.1036  | 506 |
| 0.5042  | 523 | 0.4832  | 450 | 0.1285  | 516 |
| 0.4653  | 532 | 0.4789  | 450 | 0.1531  | 525 |
| 0.4248  | 542 | 0.4676  | 450 | 0.1981  | 534 |
| 0.3714  | 551 | 0.4524  | 450 | 0.2682  | 544 |
| 0.3215  | 561 | 0.4359  | 450 | 0.3310  | 553 |
| 0.2685  | 570 | 0.4158  | 450 | 0.3587  | 563 |
| 0.2179  | 579 | 0.3966  | 450 | 0.3729  | 572 |
| 0.1764  | 589 | 0.3748  | 450 | 0.3500  | 582 |
| 0.1369  | 598 | 0.3613  | 450 | 0.3081  | 591 |
| 0.1019  | 607 | 0.3377  | 450 | 0.2623  | 600 |
| 0.0759  | 617 | 0.3187  | 450 | 0.2229  | 610 |
| 0.0545  | 627 | 0.2999  | 450 | 0.1993  | 619 |
| 0.0364  | 637 | 0.2756  | 450 | 0.1578  | 629 |
| 0.0204  | 647 | 0.2697  | 450 | 0.1402  | 638 |
| 0.0140  | 650 | 0.2484  | 450 | 0.1218  | 647 |
| 0.0125  | 650 | 0.2405  | 450 | 0.1069  | 650 |
| 0.0057  | 650 | 0.2287  | 450 | 0.0953  | 650 |
| 0.0024  | 650 | 0.2079  | 450 | 0.0903  | 650 |
| 0.0000  | 650 | 0.1974  | 450 | 0.0869  | 650 |
| 0.0030  | 650 | 0.1724  | 450 | 0.0701  | 650 |
| -0.0162 | 650 | 0.1674  | 450 | 0.0753  | 650 |
| 0.0022  | 650 | 0.1551  | 450 | 0.0701  | 650 |

|         |     |         |     |         |     |
|---------|-----|---------|-----|---------|-----|
| 0.0000  | 650 | 0.1406  | 450 | 0.0691  | 650 |
| 0.0014  | 650 | 0.1254  | 450 | 0.0640  | 650 |
| -0.0002 | 650 | 0.1167  | 450 | 0.0654  | 650 |
| 0.0012  | 650 | 0.1045  | 450 | 0.0621  | 650 |
| 0.0000  | 650 | 0.0882  | 450 | 0.0543  | 650 |
| -0.0033 | 650 | 0.0802  | 450 | 0.0496  | 650 |
| -0.0042 | 650 | 0.0758  | 450 | 0.0544  | 650 |
| 0.0017  | 650 | 0.0653  | 450 | 0.0490  | 650 |
| 0.0000  | 650 | 0.0605  | 450 | 0.0458  | 650 |
| 0.0028  | 650 | 0.0509  | 450 | 0.0443  | 650 |
| 0.0044  | 650 | 0.0456  | 450 | 0.0447  | 650 |
| 0.0086  | 650 | 0.0282  | 450 | 0.0343  | 650 |
| 0.0000  | 650 | 0.0287  | 450 | 0.0345  | 650 |
| 0.0047  | 650 | 0.0253  | 450 | 0.0318  | 650 |
| 0.0038  | 650 | 0.0204  | 450 | 0.0322  | 650 |
| 0.0015  | 650 | 0.0162  | 450 | 0.0254  | 650 |
| 0.0000  | 650 | 0.0121  | 450 | 0.0256  | 650 |
| -0.0059 | 650 | 0.0070  | 450 | 0.0141  | 650 |
| 0.0004  | 650 | 0.0037  | 450 | 0.0115  | 650 |
| -0.0046 | 650 | 0.0038  | 449 | 0.0086  | 650 |
| -0.0051 | 650 | 0.0056  | 450 | 0.0020  | 650 |
| -0.0010 | 650 | 0.0000  | 450 | -0.0022 | 650 |
| -0.0035 | 650 | -0.0015 | 450 | -0.0030 | 650 |
| -0.0062 | 650 | 0.0002  | 450 | -0.0043 | 650 |
| -0.0045 | 650 | -0.0095 | 450 | 0.0005  | 650 |
| -0.0057 | 650 | -0.0037 | 450 | -0.0055 | 650 |
| -0.0071 | 650 | 0.0033  | 450 | -0.0003 | 650 |
| -0.0054 | 650 | 0.0013  | 450 | 0.0024  | 650 |
| -0.0051 | 650 | 0.0000  | 450 | 0.0000  | 650 |
| -0.0061 | 650 | -0.0001 | 450 | 0.0012  | 650 |
| -0.0055 | 650 | 0.0040  | 450 | -0.0036 | 650 |
| -0.0048 | 650 | -0.0078 | 450 | 0.0043  | 650 |
| -0.0029 | 650 | 0.0013  | 450 | 0.0060  | 650 |
| -0.0035 | 650 | 0.0023  | 450 | 0.0000  | 650 |
| -0.0016 | 650 | 0.0045  | 450 | 0.0057  | 650 |
| -0.0037 | 650 | 0.0000  | 450 | 0.0011  | 650 |
| -0.0032 | 650 | 0.0003  | 450 | -0.0004 | 650 |
| -0.0008 | 650 | -0.0008 | 450 | -0.0007 | 650 |
| -0.0061 | 650 | -0.0139 | 450 | 0.0000  | 650 |
